# Supplementary material
Source: publisher figshare collection journal article supplement (https://frontiersin.figshare.com/ndownloader/files/34271378)

Supplementary material

Figure S1: Evaluation of the NorKyst800 model outputs into the Porsanger for (A) inner, (B) central, and (C) outer fjord.

The data used for the ground-truthing were collected by R. Mankettikkara and colleagues and were retrieved from the Arctic University of Tromsø database: <https://dataverse.no/dataverse/uit?q=Mankettikkara&types=datasets&sort=score&order=desc&page=1>. Those data are publicly available and contain values of salinity, temperature, and depth, collected into the Porsanger from the end of the 1970s until 2013. The sampling sites are not the same from one year to another and the time of the year it was collected also varies. Corresponding values were extracted from the NorKyst800 model outputs. Mean absolute error was computed in each area (sampling sites were grouped into an area corresponding to the ones used in this study, i.e. inner, central, outer).

Temporal trends are not significant, except for surface salinity in the central fjord (B) where the mean difference between model and observation significantly decreases.


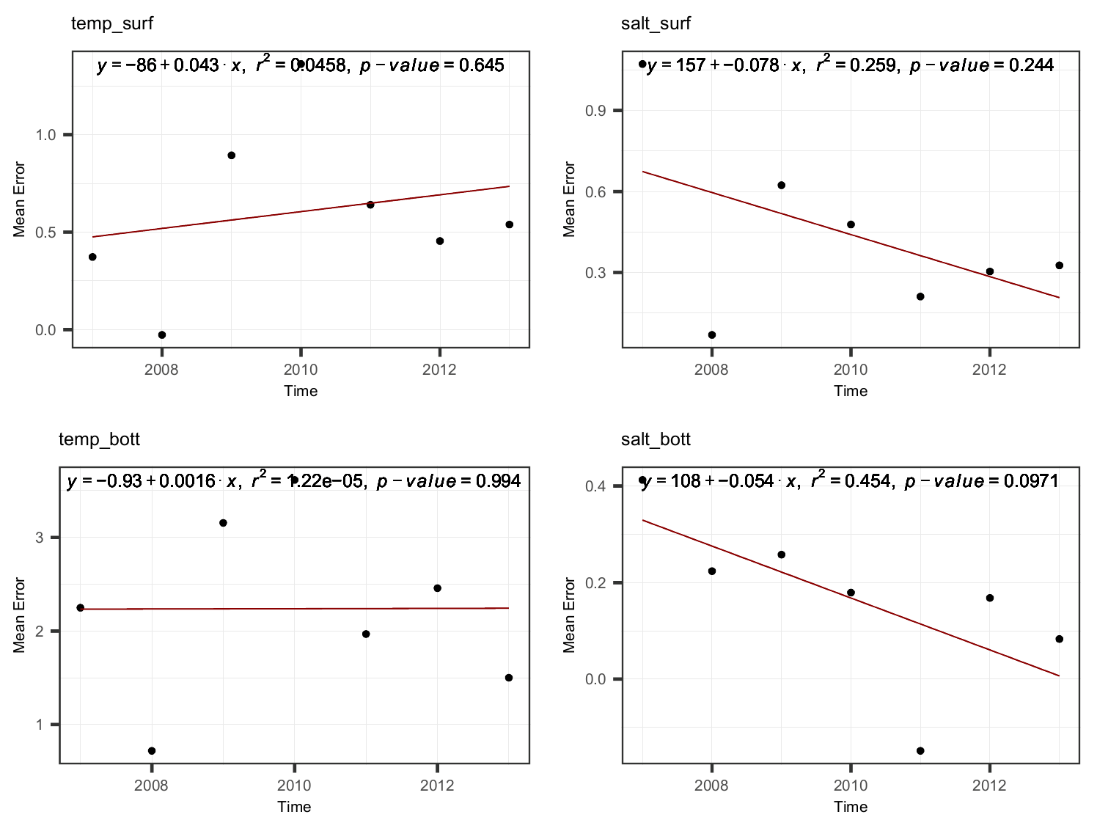


A


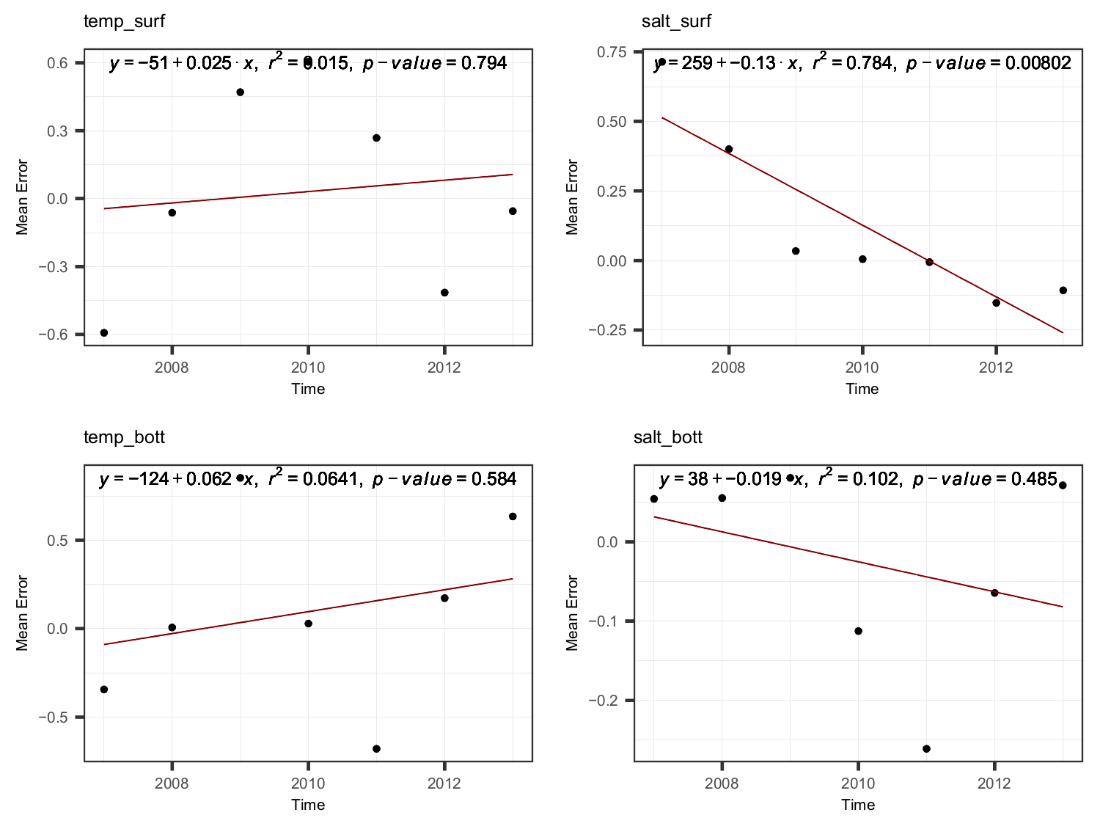


C
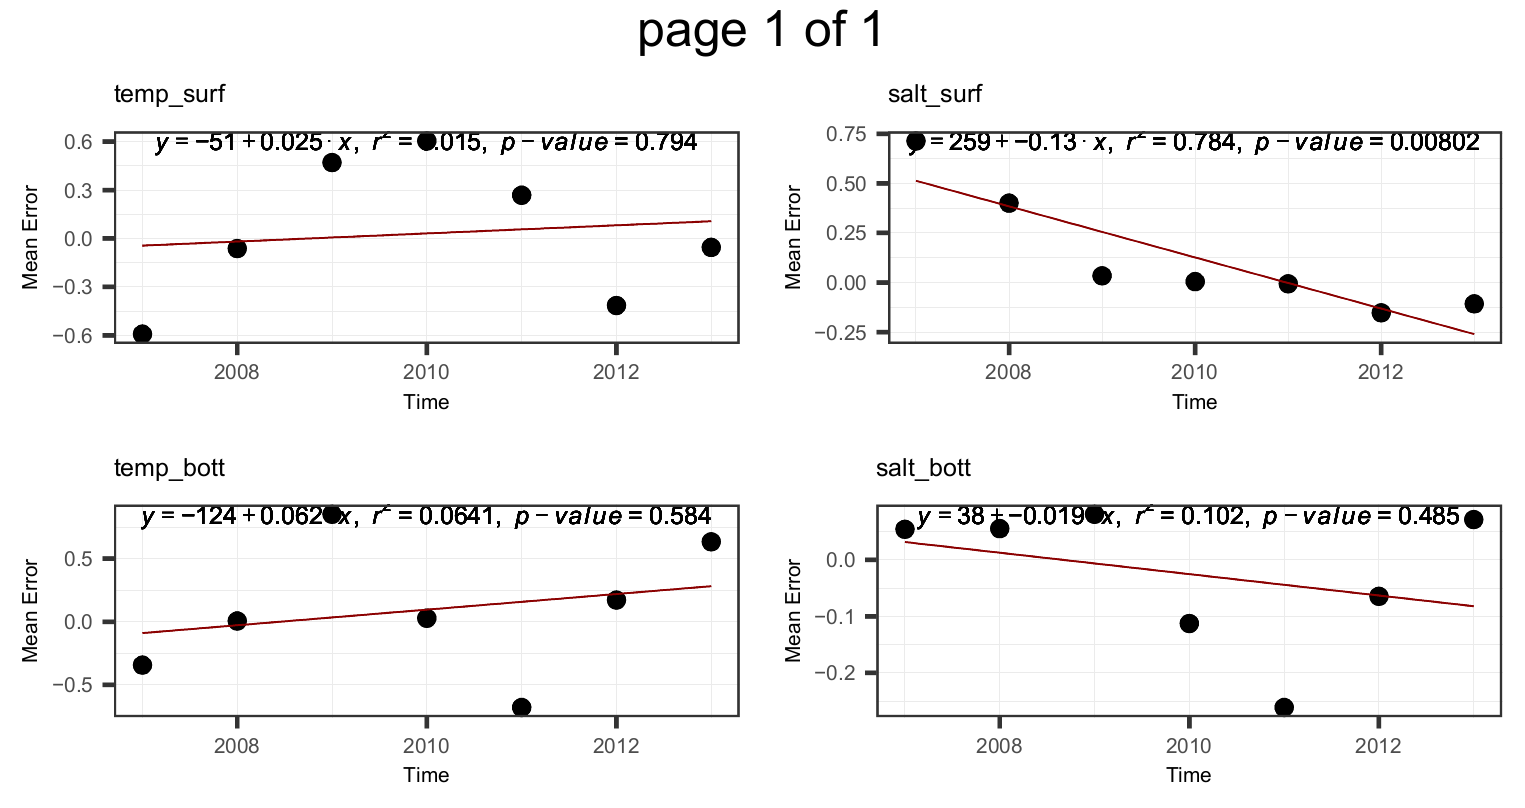


B


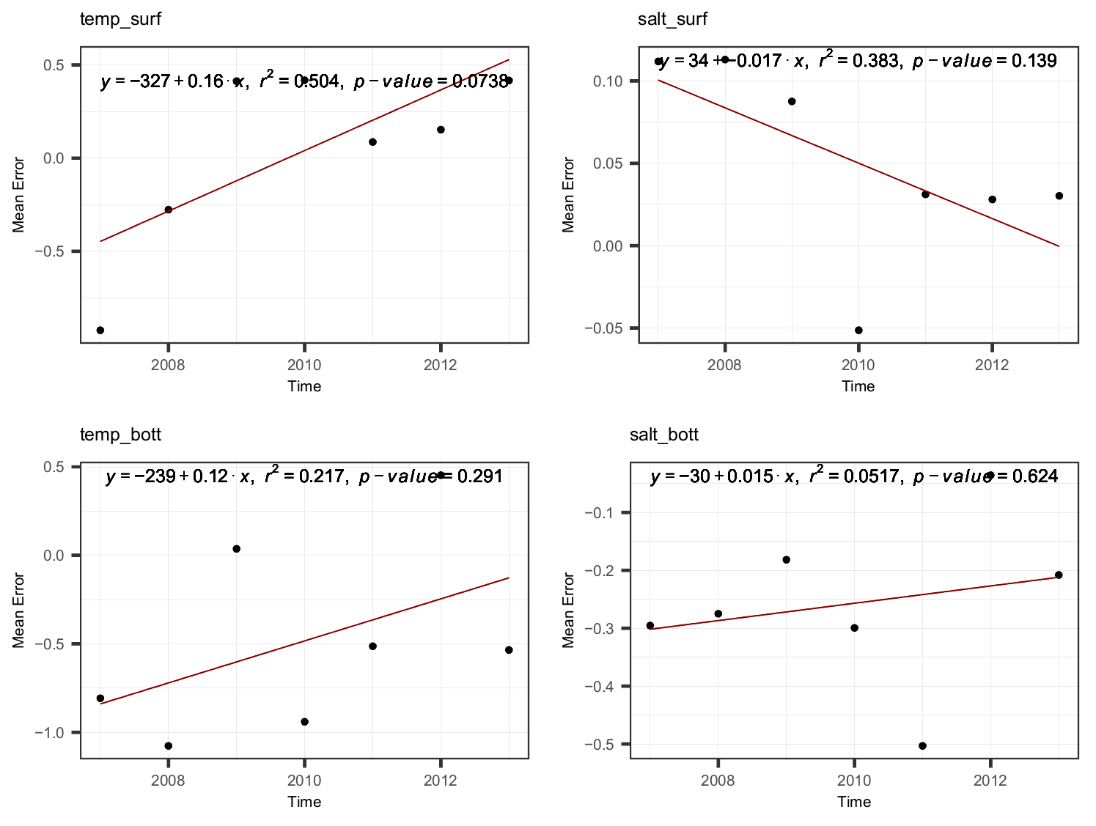


Spatial bias was tested investigating whether there were significant differences in the mean difference across areas. This was done with a non-parametric multiple pairwise Kruskal-Wallis test, with the function *kruskalmc* from the *pgirmess* r package. In the results below, the “TRUE” difference shows a significant difference in the mean difference between the two areas.

| **Surface temperature** | obs.dif | critical.dif | difference |
| --- | --- | --- | --- |
| central-inner | 11.22778 | 43.12029 | FALSE |
| central-outer | 42.80020 | 40.74757 | TRUE |
| inner-outer | 54.02798 | 51.59029 | TRUE |

| **Bottom temperature** | obs.dif | critical.dif | difference |
| --- | --- | --- | --- |
| central-inner | 83.015657 | 43.12029 | TRUE |
| central-outer | 7.339592 | 40.74757 | FALSE |
| inner-outer | 90.355248 | 51.59029 | TRUE |

| **Surface salinity** | obs.dif | critical.dif | difference |
| --- | --- | --- | --- |
| central-inner | 79.634848 | 43.12029 | TRUE |
| central-outer | 4.185968 | 40.74757 | FALSE |
| inner-outer | 75.448880 | 51.59029 | TRUE |

| **Bottom salinity** | obs.dif | critical.dif | difference |
| --- | --- | --- | --- |
| central-inner | 79.04141 | 43.12029 | TRUE |
| central-outer | 15.77036 | 40.74757 | FALSE |
| inner-outer | 63.27106 | 51.59029 | TRUE |

Table S1: Megabenthic taxa grouping and full list of species

Explanations of the groupings of certain taxa due to phylogenic nesting.

(1) Taxa that had a lower taxonomic level also present in the dataset (for instance *ophiura*

*sarsii* grouped with ophiuroidea) were grouped together.

(2) Nevertheless, when the taxonomic level was too high (class for instance, such as bivalvia), the

taxa were deleted because it would have led to group too many different taxa (including boreal

and arctic taxa) together. For each grouping, a check of the spatial distribution was done (i.e. atlantic or arctic) to prevent from grouping boreal and arctic taxa together which could have weakened the trends of the biomass facing climate change.

For (1) I grouped:

• Nicomache and Maldanidae (both Atlantic+Arctic distribution) in Maldanidae

• Terebellidae, Thelepus (both Atlantic+Arctic distribution) in Terebellidae

• Gammarus, Liljeborgidae, Amphipoda, *Arrhis phyllonyx* , Anonyx (all Atlantic+Arctic distribution)

in Amphipoda

• Nymphon, Pycnogonida (both Atlantic+Arctic distribution) in Pycnogonida

• Terebratulida, Brachiopoda (both large distribution) in Brachiopoda

• Bryozoa, Reteporella (both large distribution) in Bryozoa

• Polycitoridae, Ascidiacea, Molgulidae, Styelidae (both large distribution) in Ascidiacea

• Edwardsiidae, Hormathiidae, Metridiidae, Actiniaria (all large distribution) in Actiniaria

• Haleciidae, Lafoeidae, Hydrozoa (all large distribution) in Hydrozoa

• *Diplopteraster multipes*, Pterasteridae (both Atlantic+Arctic distribution) in Pterasteridae

• Myriotrochidae, *Cucumaria frondosa*, Thyonidium, Psolus, *Eupyrgus scaber*, Holothuroidea (all large

or Atlantic + Arctic distribution) in Holothuroidea

• Ophiuridae, *Ophiura robusta*, *Ophiura sarsii* (all Atlantic+Arctic distribution) in Ophiuridae

• *Euspira pallida*, Naticidae (both Atlantic+Arctic distribution) in Naticidae

• Colus, Buccinidae, Neptunea (all Atlantic+Arctic distribution) in Buccinidae

• Polymastiidae, *Tentorium semisuberites* (all Atlantic+Arctic distribution) in Polymastiidae

• Golfingia, Nephasoma, Phascolion, Sipunculidea (all large distribution) in Sipunculidea

• *Pandalus borealis* and *Pandalus montagui* (both Atlantic+Arctic distribution) in Pandalidae

For (2) the following taxa were removed:

• Polychaeta that encompasses 22 other taxa in the database

• Asteroidea that encompasses 7 other taxa in the database

• Bivalvia that encompasses 23 other taxa in the database, notably the arctic *chlamys islandica*

• Pectinidae that encompasses 5 other taxa in the database, notably the arctic *chlamys islandica*

• Gastropoda that encompasses 18 other taxa in the database

• Porifera that encompasses 10 other taxa in the database

| **Dataset** | **Latin name** | **Phylum** | **Class** | **Order** | **Family** |
| --- | --- | --- | --- | --- | --- |
| Benthos | Actiniaria | Cnidaria | Anthozoa | Actiniaria |  |
| Benthos | Ampharetidae | Annelida | Polychaeta | Terebellida | Ampharetidae |
| Benthos | Amphipoda | Arthropoda | Malacostraca | Amphipoda |  |
| Benthos | Anomiidae | Mollusca | Bivalvia | Pectinida | Anomiidae |
| Benthos | Ascidiacea | Chordata | Ascidiacea |  |  |
| Benthos | Astarte | Mollusca | Bivalvia | Carditida | Astartidae |
| Benthos | Axinellida | Porifera | Demospongiae | Axinellida |  |
| Benthos | Bathyarca glacialis | Mollusca | Bivalvia | Arcida | Arcidae |
| Benthos | Boreotrophon | Mollusca | Gastropoda | Neogastropoda | Muricidae |
| Benthos | Brachiopoda | Brachiopoda |  |  |  |
| Benthos | Brada | Annelida | Polychaeta | Terebellida | Flabelligeridae |
| Benthos | Bryozoa | Bryozoa |  |  |  |
| Benthos | Buccinidae | Mollusca | Gastropoda | Neogastropoda | Buccinidae |
| Benthos | Chlamys | Mollusca | Bivalvia | Pectinida | Pectinidae |
| Benthos | Chlamys islandica | Mollusca | Bivalvia | Pectinida | Pectinidae |
| Benthos | Ciliatocardium ciliatum | Mollusca | Bivalvia | Cardiida | Cardiidae |
| Benthos | Cirripedia | Arthropoda | Hexanauplia |  |  |
| Benthos | Cryptonatica affinis | Mollusca | Gastropoda | Littorinimorpha | Naticidae |
| Benthos | Ctenodiscus crispatus | Echinodermata | Asteroidea | Paxillosida | Ctenodiscidae |
| Benthos | Cylichna alba | Mollusca | Gastropoda | Cephalaspidea | Cylichnidae |
| Benthos | Diastylidae | Arthropoda | Malacostraca | Cumacea | Diastylidae |
| Benthos | Echinus | Echinodermata | Echinoidea | Camarodonta | Echinidae |
| Benthos | Epizoanthidae | Cnidaria | Anthozoa | Zoantharia | Epizoanthidae |
| Benthos | Euphausiidae | Arthropoda | Malacostraca | Euphausiacea | Euphausiidae |
| Benthos | Gorgonocephalus | Echinodermata | Ophiuroidea | Euryalida | Gorgonocephalidae |
| Benthos | Henricia | Echinodermata | Asteroidea | Spinulosida | Echinasteridae |
| Benthos | Hiatella | Mollusca | Bivalvia | Adapedonta | Hiatellidae |
| Benthos | Holothuroidea | Echinodermata | Holothuroidea |  |  |
| Benthos | Hyas | Arthropoda | Malacostraca | Decapoda | Oregoniidae |
| Benthos | Hydrozoa | Cnidaria | Hydrozoa |  |  |
| Benthos | Lebbeus polaris | Arthropoda | Malacostraca | Decapoda | Thoridae |
| Benthos | Lepetidae | Mollusca | Gastropoda |  | Lepetidae |
| Benthos | Lithodes maja | Arthropoda | Malacostraca | Decapoda | Lithodidae |
| Benthos | Maldanidae | Annelida | Polychaeta |  | Maldanidae |
| Benthos | Margaritidae | Mollusca | Gastropoda | Trochida | Margaritidae |
| Benthos | Munida sarsi | Arthropoda | Malacostraca | Decapoda | Munididae |
| Benthos | Mysidae | Arthropoda | Malacostraca | Mysida | Mysidae |
| Benthos | Mytilus | Mollusca | Bivalvia | Mytilida | Mytilidae |
| Benthos | Naticidae | Mollusca | Gastropoda | Littorinimorpha | Naticidae |
| Benthos | Nematoda | Nematoda |  |  |  |
| Benthos | Nephtheidae | Cnidaria | Anthozoa | Alcyonacea | Nephtheidae |
| Benthos | Nephtyidae | Annelida | Polychaeta | Phyllodocida | Nephtyidae |
| Benthos | Nuculana | Mollusca | Bivalvia | Nuculanida | Nuculanidae |
| Benthos | Nudibranchia | Mollusca | Gastropoda | Nudibranchia |  |
| Benthos | Ophiacantha | Echinodermata | Ophiuroidea | Ophiacanthida | Ophiacanthidae |
| Benthos | Ophiopholis aculeata | Echinodermata | Ophiuroidea | Amphilepidida | Ophiopholidae |
| Benthos | Ophiuridae | Echinodermata | Ophiuroidea | Ophiurida | Ophiuridae |
| Benthos | Oweniidae | Annelida | Polychaeta |  | Oweniidae |
| Benthos | Pagurus | Arthropoda | Malacostraca | Decapoda | Paguridae |
| Benthos | Pandalidae | Arthropoda | Malacostraca | Decapoda | Pandalidae |
| Benthos | Paralithodes camtschaticus | Arthropoda | Malacostraca | Decapoda | Lithodidae |
| Benthos | Pectinariidae | Annelida | Polychaeta | Terebellida | Pectinariidae |
| Benthos | Polymastiidae | Porifera | Demospongiae | Polymastiida | Polymastiidae |
| Benthos | Polynoidae | Annelida | Polychaeta | Phyllodocida | Polynoidae |
| Benthos | Polyplacophora | Mollusca | Polyplacophora |  |  |
| Benthos | Pontophilus norvegicus | Arthropoda | Malacostraca | Decapoda | Crangonidae |
| Benthos | Pterasteridae | Echinodermata | Asteroidea | Velatida | Pterasteridae |
| Benthos | Pycnogonida | Arthropoda | Pycnogonida |  |  |
| Benthos | Rossia | Mollusca | Cephalopoda | Sepiida | Sepiolidae |
| Benthos | Sabellidae | Annelida | Polychaeta | Sabellida | Sabellidae |
| Benthos | Sabinea septemcarinata | Arthropoda | Malacostraca | Decapoda | Crangonidae |
| Benthos | Scaphopoda | Mollusca | Scaphopoda |  |  |
| Benthos | Sclerocrangon boreas | Arthropoda | Malacostraca | Decapoda | Crangonidae |
| Benthos | Similipecten greenlandicus | Mollusca | Bivalvia | Pectinida | Propeamussiidae |
| Benthos | Sipunculidea | Sipuncula | Sipunculidea |  |  |
| Benthos | Spiochaetopterus typicus | Annelida | Polychaeta |  | Chaetopteridae |
| Benthos | Spirontocaris | Arthropoda | Malacostraca | Decapoda | Thoridae |
| Benthos | Strongylocentrotus | Echinodermata | Echinoidea | Camarodonta | Strongylocentrotidae |
| Benthos | Terebellidae | Annelida | Polychaeta | Terebellida | Terebellidae |
| Benthos | Yoldia hyperborea | Mollusca | Bivalvia | Nuculanida | Yoldiidae |
| Benthos | Yoldiella | Mollusca | Bivalvia | Nuculanida | Yoldiidae |
| Fish | Amblyraja radiata | Vertebrata | Elasmobranchii | Rajiformes | Rajidae |
| Fish | Anarhichas lupus | Vertebrata | Actinopteri | Perciforms | Anarhichadidae |
| Fish | Argentina | Vertebrata | Actinopteri | Argentiniformes | Argentinidae |
| Fish | Artediellus atlanticus | Vertebrata | Actinopteri | Perciformes | Cottidae |
| Fish | Clupea harengus | Vertebrata | Actinopteri | Clupeiformes | Clupeidae |
| Fish | Enchelyopus cimbrius | Vertebrata | Actinopteri | Gadiformes | Lotidae |
| Fish | Gadiculus argenteus | Vertebrata | Actinopteri | Gadiformes | Gadidae |
| Fish | Gadus morhua | Vertebrata | Actinopteri | Gadiformes | Gadidae |
| Fish | Glyptocephalus cynoglossus | Vertebrata | Actinopteri | Pleuronectiformes | Pleuronectidae |
| Fish | Hippoglossoides platessoides | Vertebrata | Actinopteri | Pleuronectiformes | Pleuronectidae |
| Fish | Hippoglossus hippoglossus | Vertebrata | Actinopteri | Pleuronectiformes | Pleuronectidae |
| Fish | Leptoclinus maculatus | Vertebrata | Actinopteri | Perciformes | Stichaeidae |
| Fish | Lycodes gracilis | Vertebrata | Actinopteri | Perciformes | Zoarcidae |
| Fish | Mallotus villosus | Vertebrata | Actinopteri | Osmeridae | Osmeridae |
| Fish | Melanogrammus aeglefinus | Vertebrata | Actinopteri | Gadiformes | Gadidae |
| Fish | Merlangius merlangus | Vertebrata | Actinopteri | Gadiformes | Gadidae |
| Fish | Micromesistius poutassou | Vertebrata | Actinopteri | Gadiformes | Gadidae |
| Fish | Microstomus kitt | Vertebrata | Actinopteri | Pleuronectiformes | Pleuronectidae |
| Fish | Myctophiformes | Vertebrata | Actinopteri | Myctophiformes |  |
| Fish | Pleuronectes platessa | Vertebrata | Actinopteri | Pleuronectiformes | Pleuronectidae |
| Fish | Pollachius virens | Vertebrata | Actinopteri | Gadiformes | Gadidae |
| Fish | Rajella fyllae | Vertebrata | Elasmobranchii | Rajiformes | Rajidae |
| Fish | Sebastes | Vertebrata | Actinopteri | Perciformes | Sebastidae |
| Fish | Trisopterus esmarkii | Vertebrata | Actinopteri | Gadiformes | Gadidae |

*Fig. S2: Yearly distribution of the sampling sites amongst the areas of the fjord (inner, central, outer for megabenthos data set (A) and central and outer for fish data set (B)). Yearly distribution of sediment types amongst the sampling sites (for megabenthos data set (C) and fish data set (D)).*


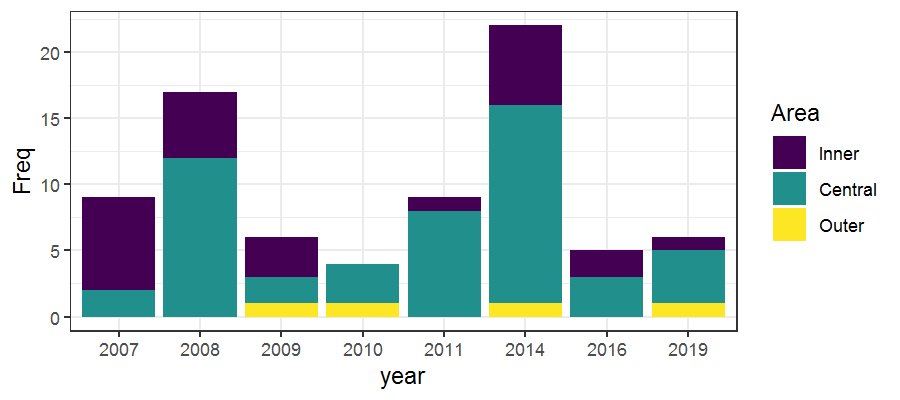


A

B


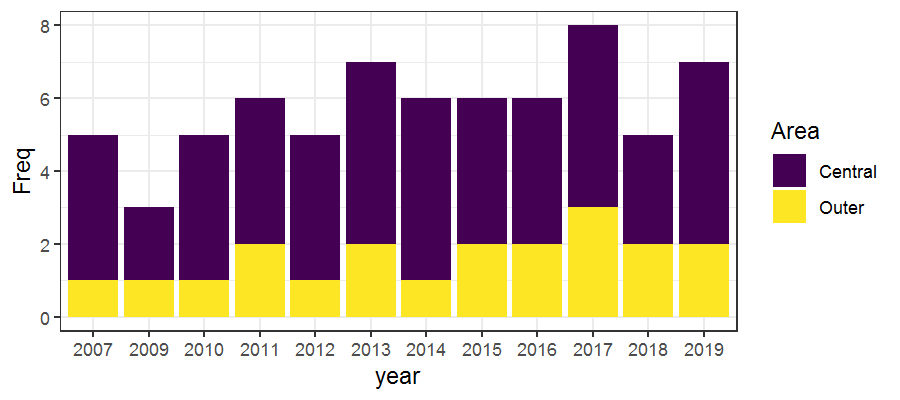


C


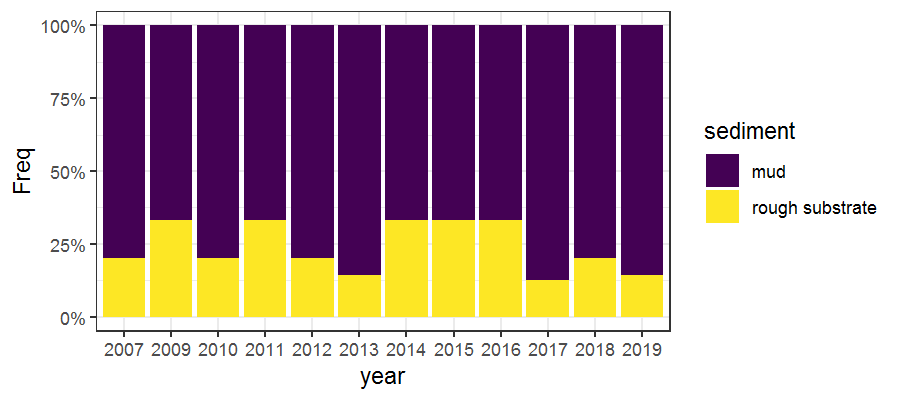


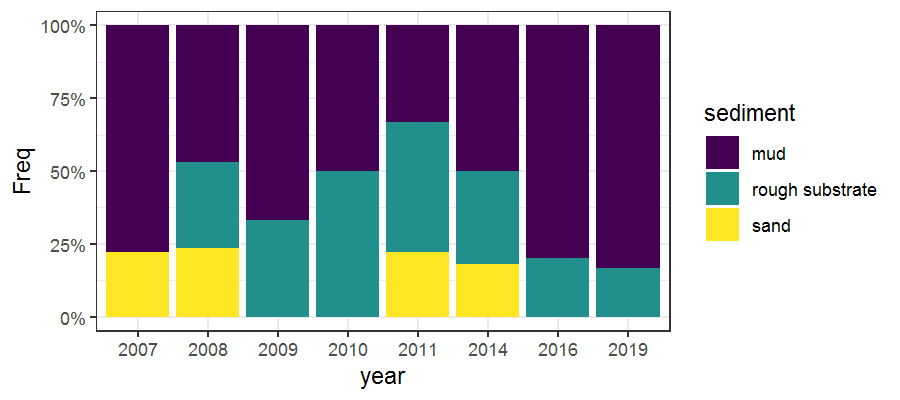


D

Fig. S3: Stratified biomass in the inner fjord. Only the 5 taxa with the largest biomass each year have their name printed.


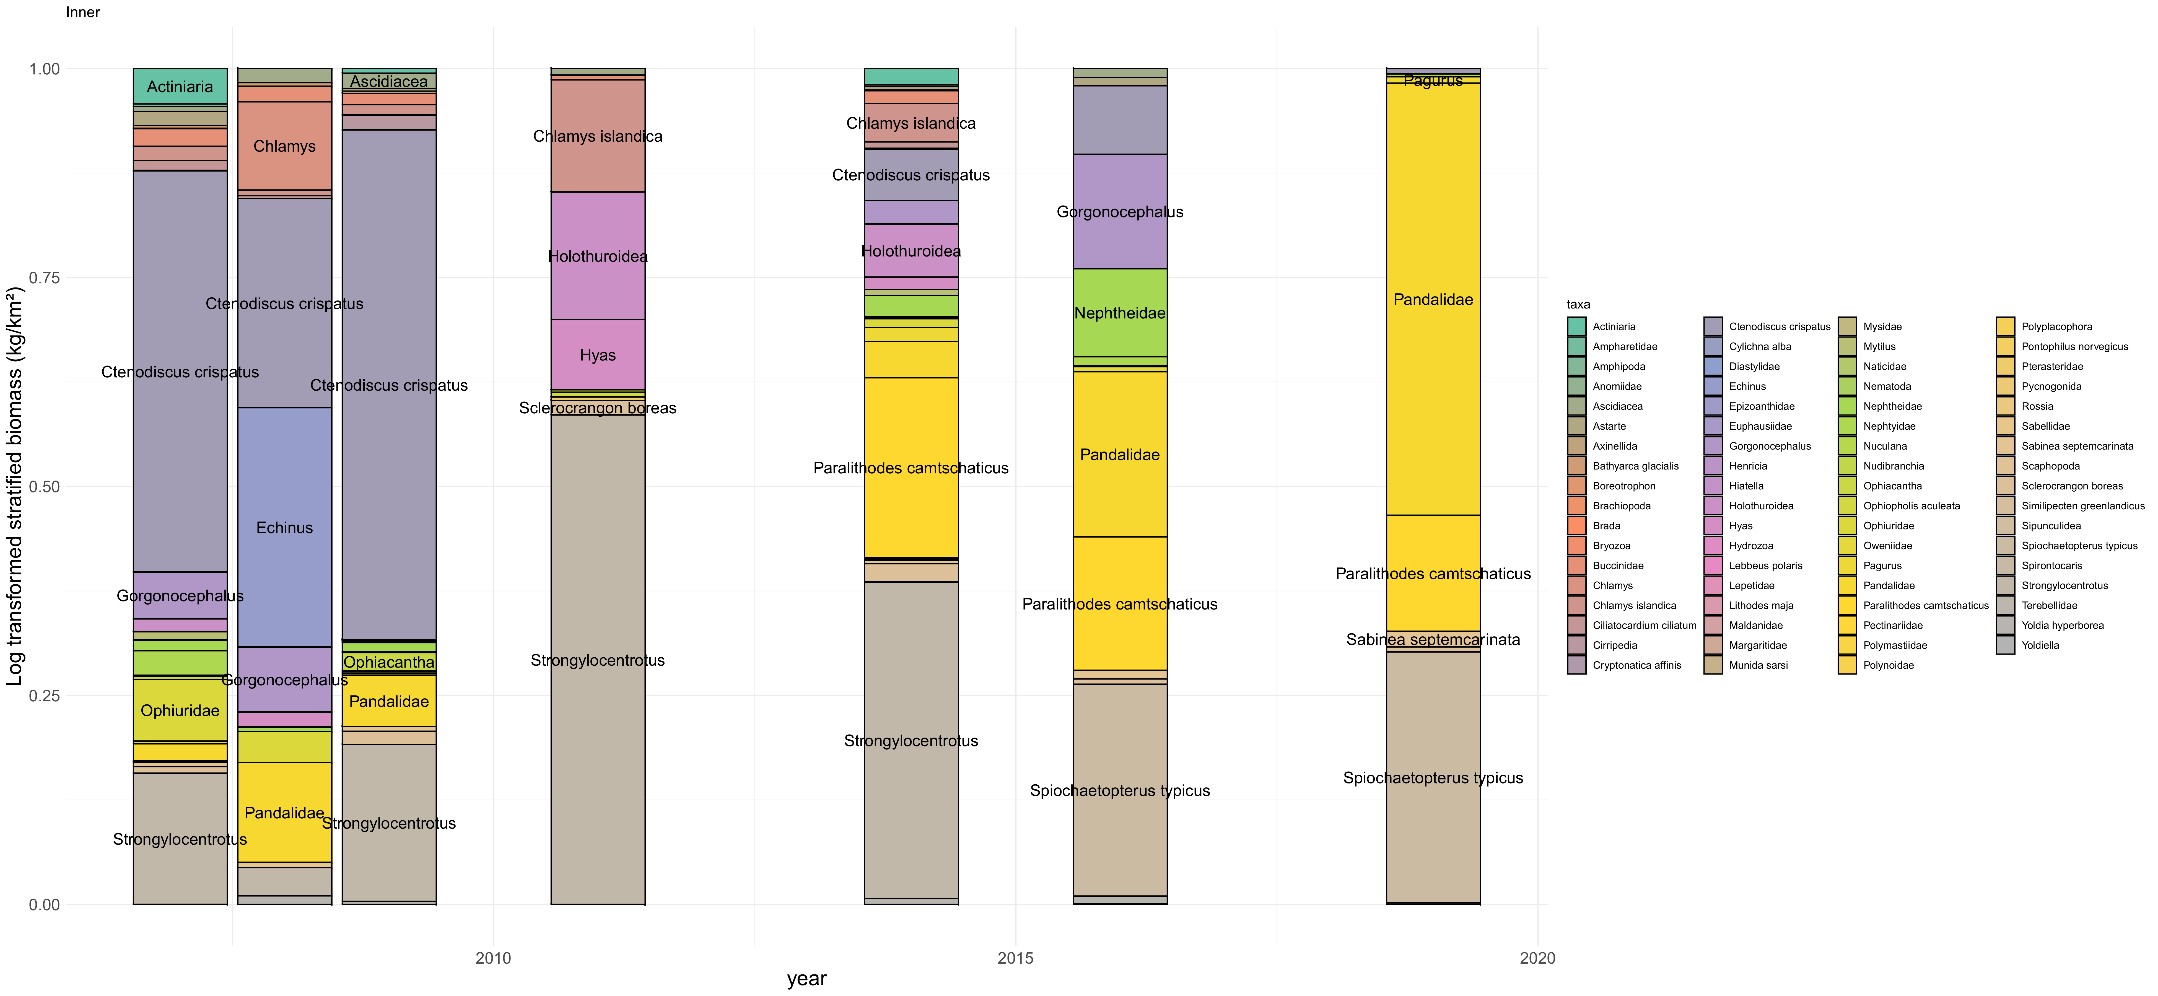

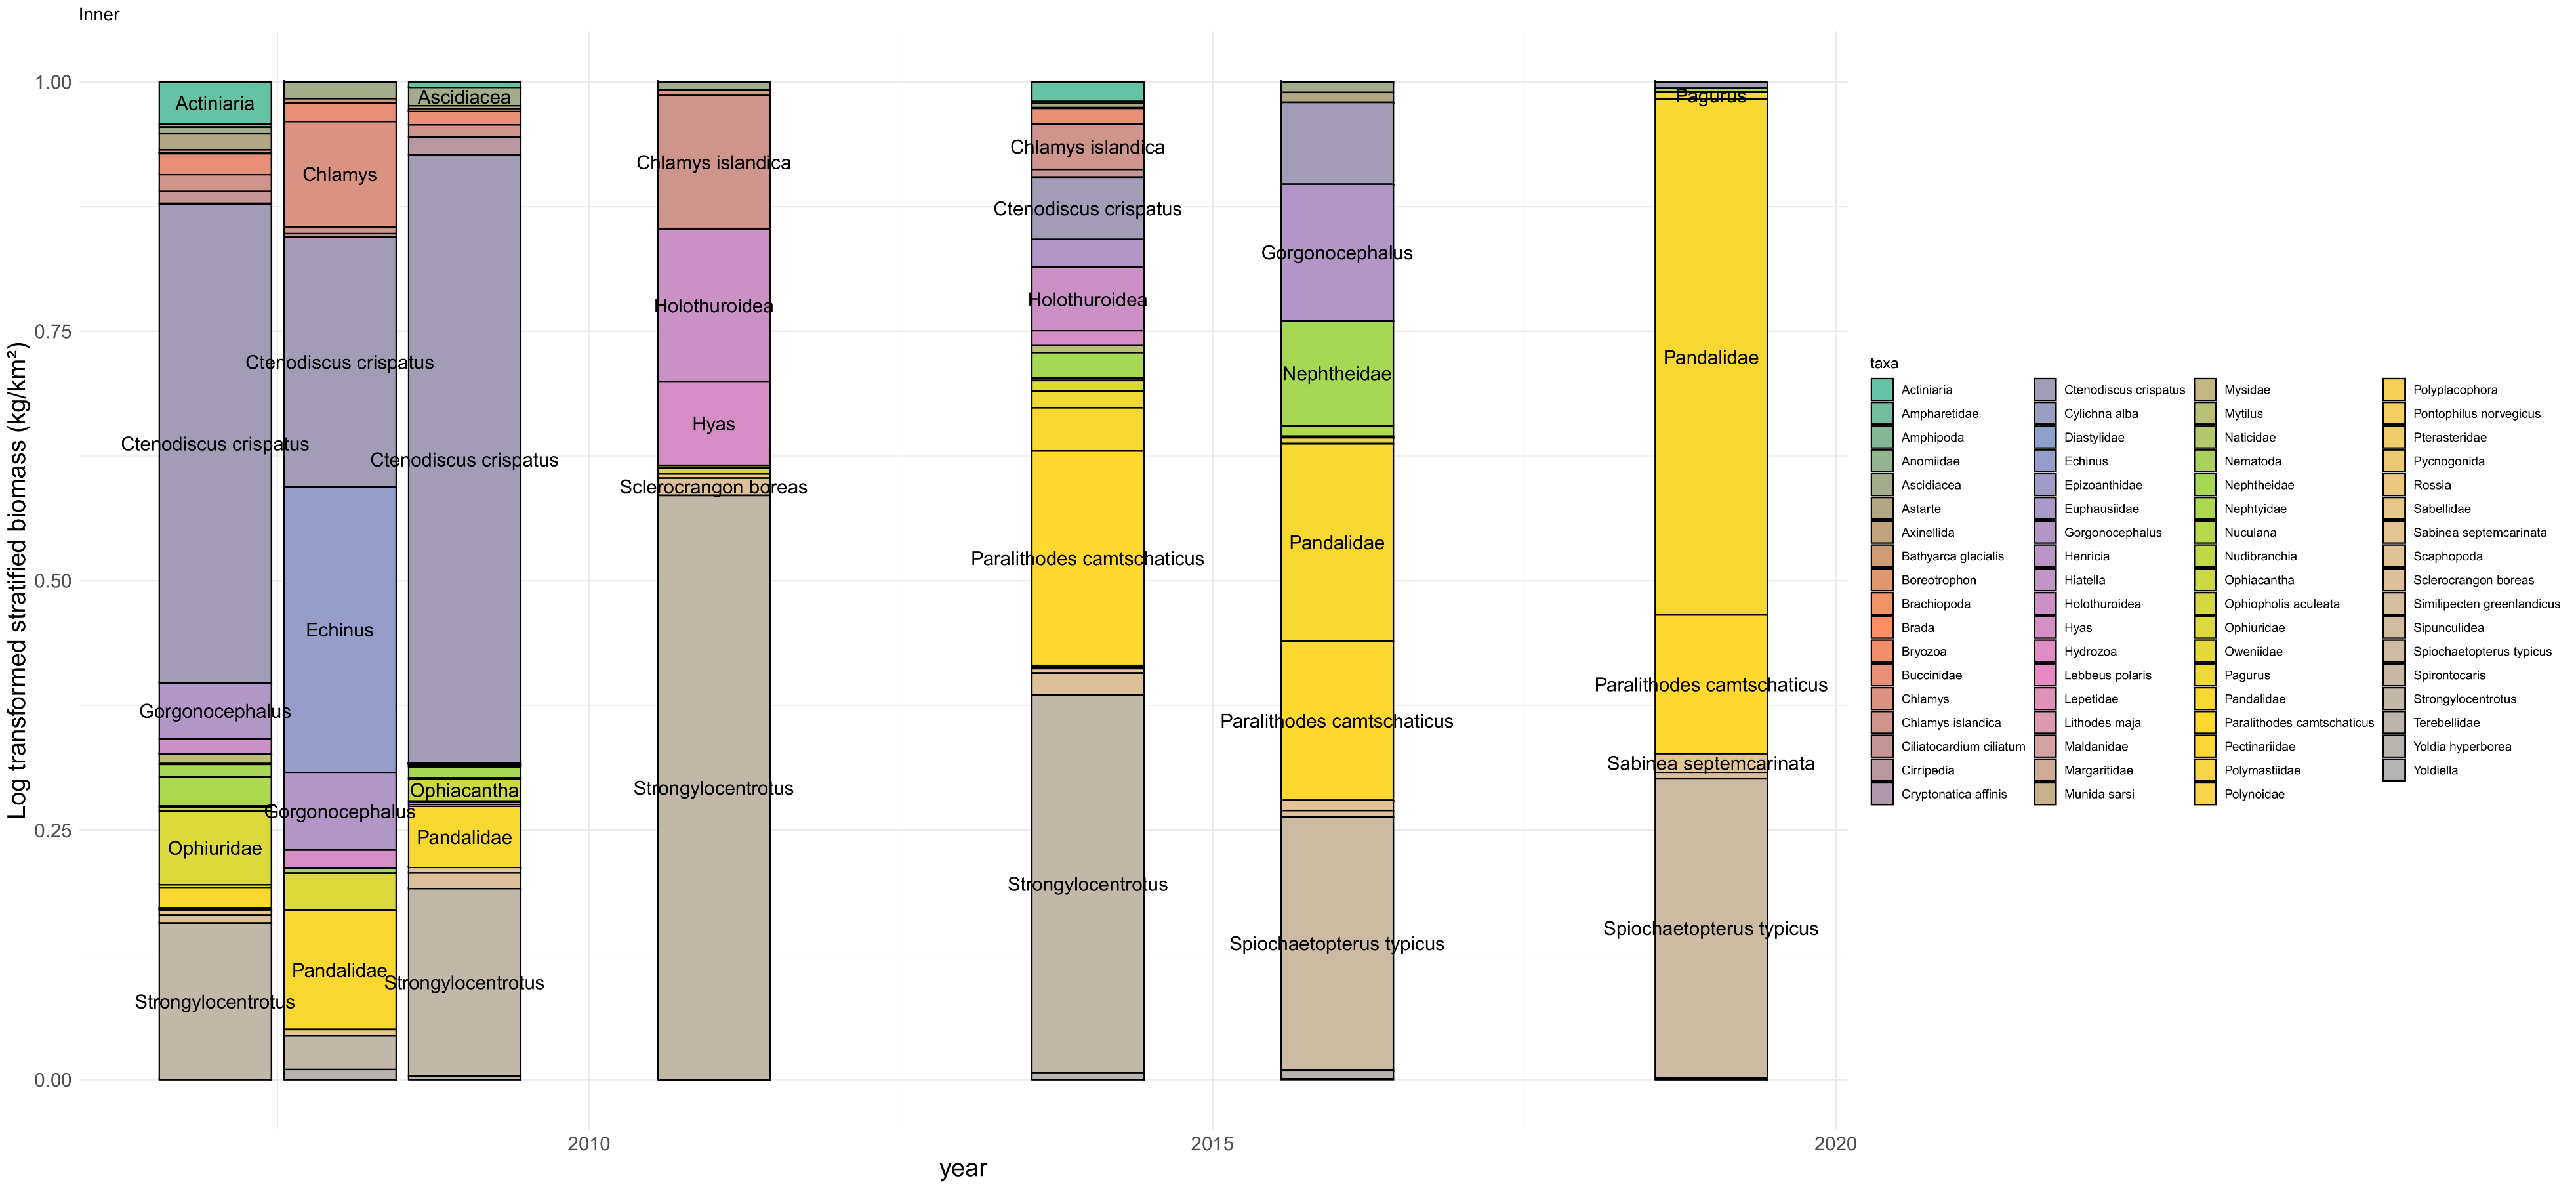


Fig. S4: Regression plot corresponding to Table 1 and Table 2 of the manuscript.


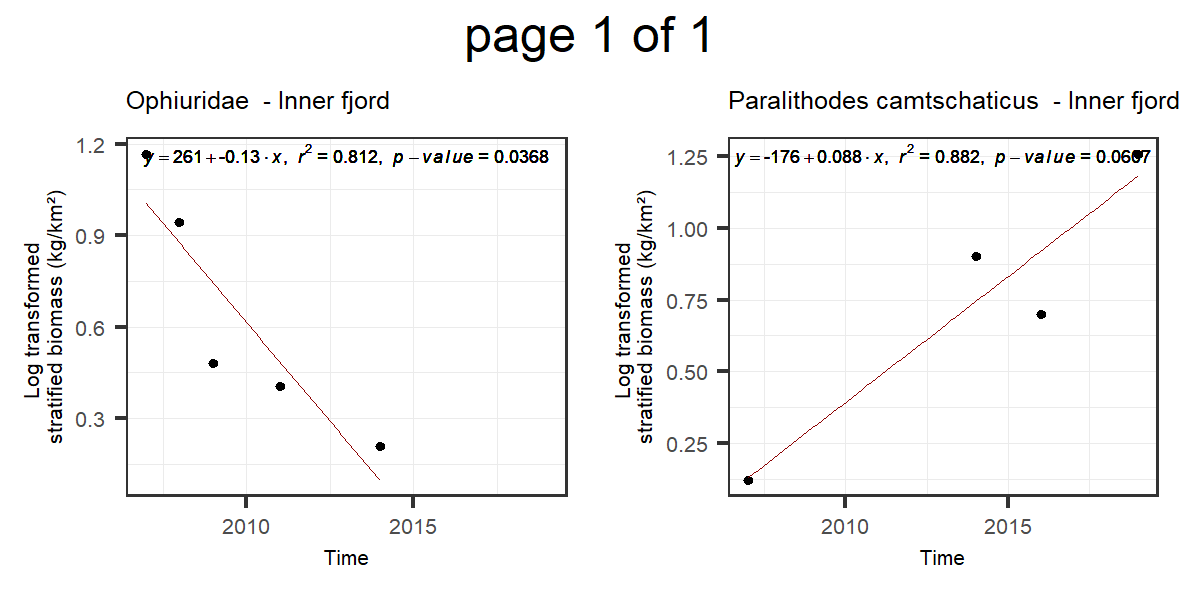

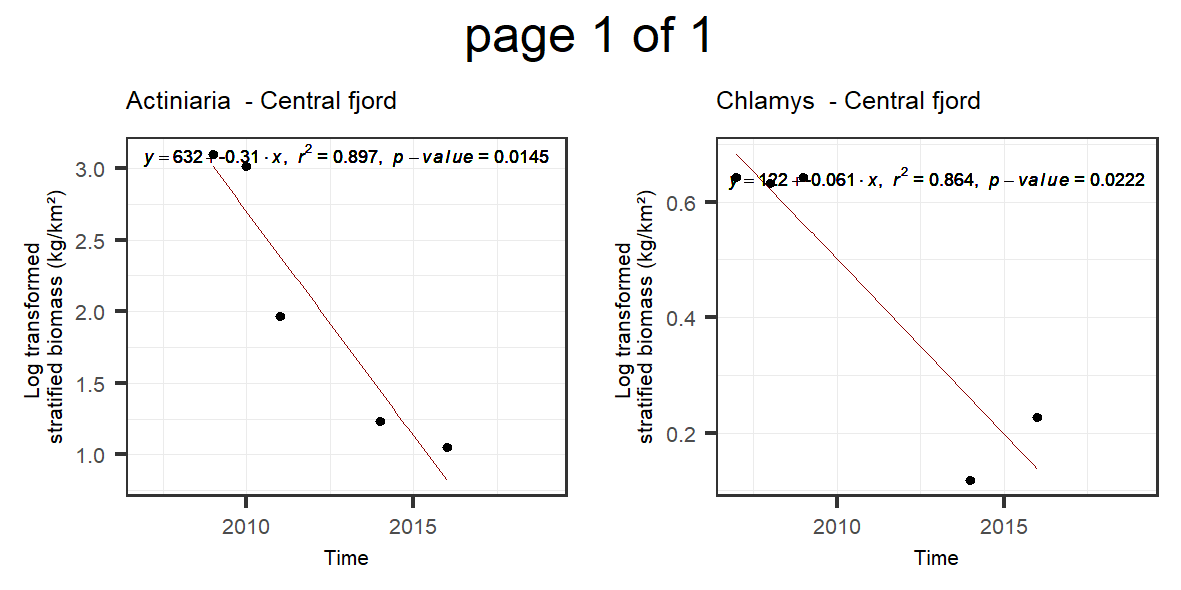

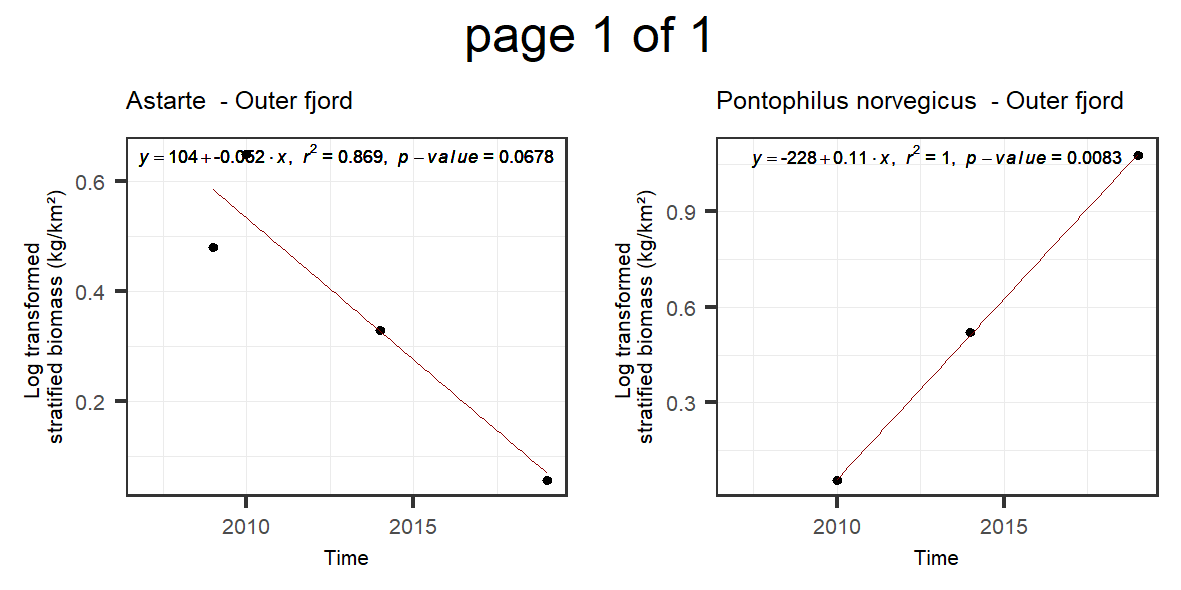

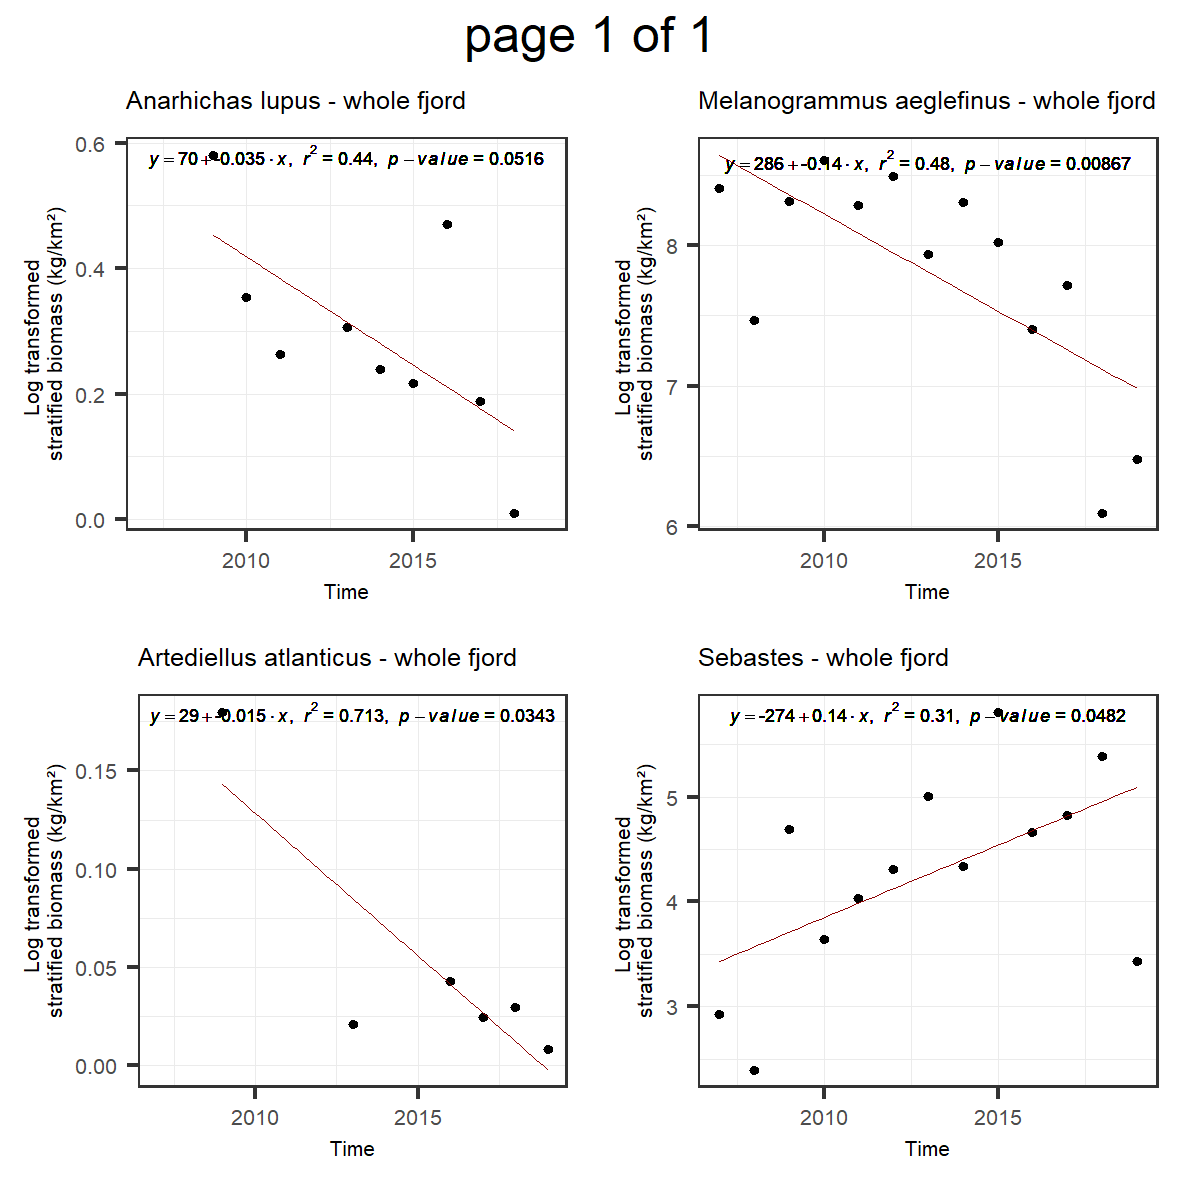


*
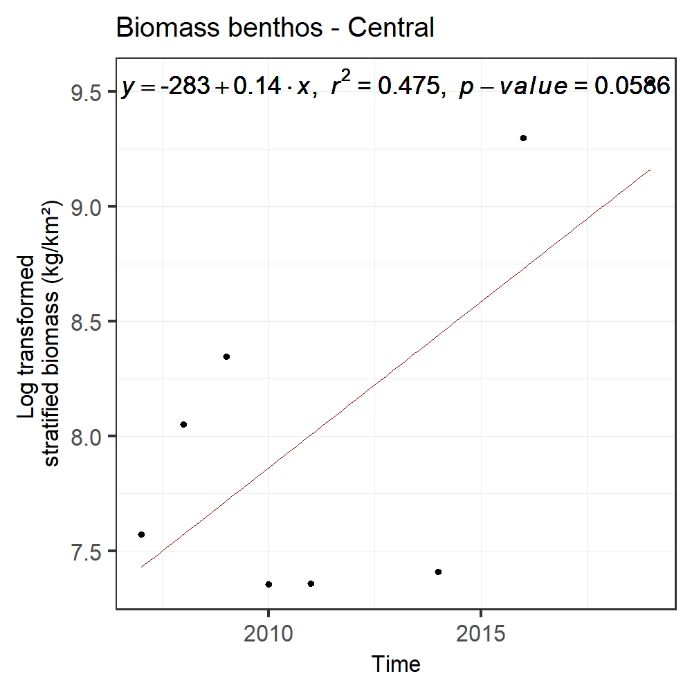

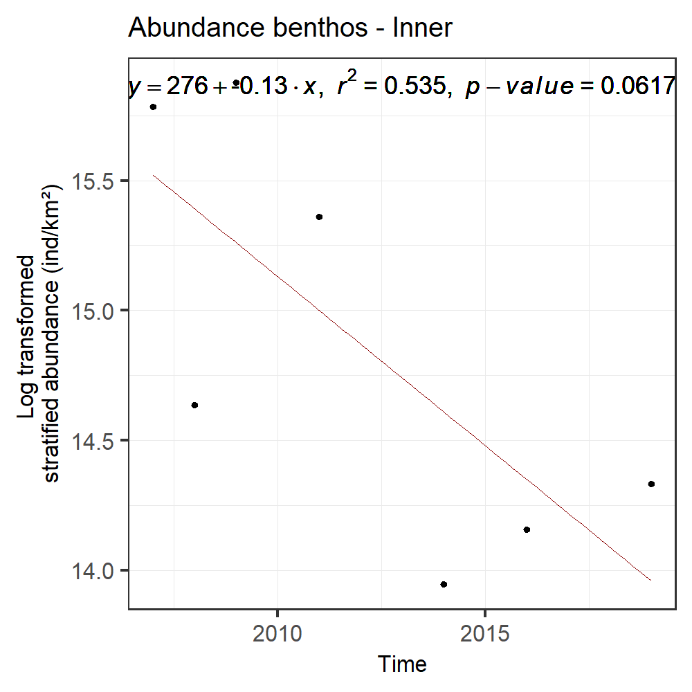

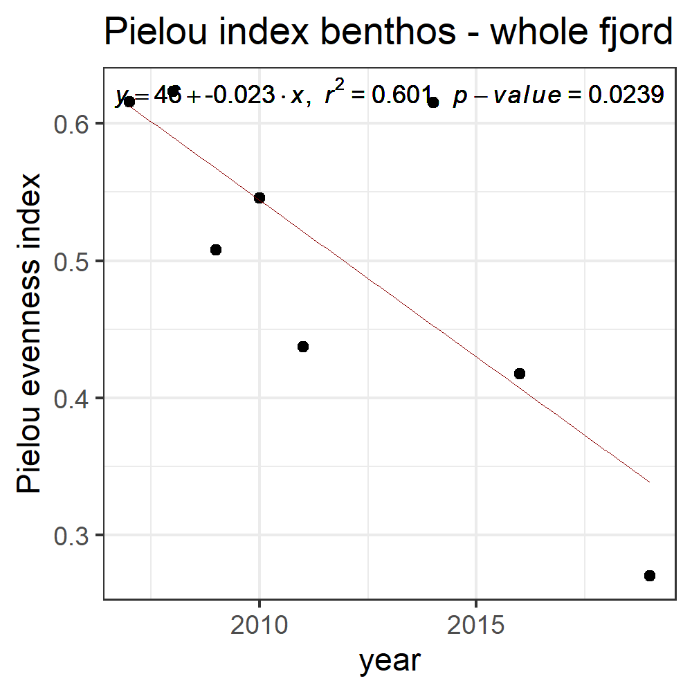

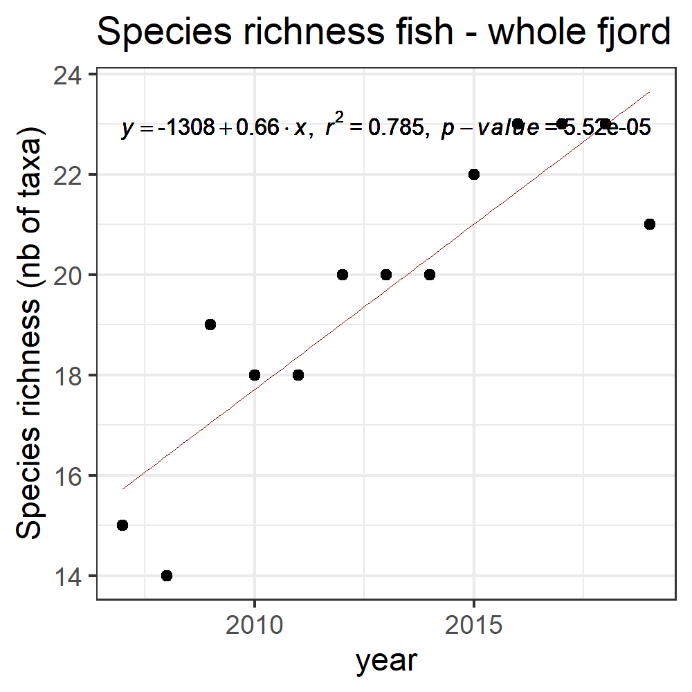

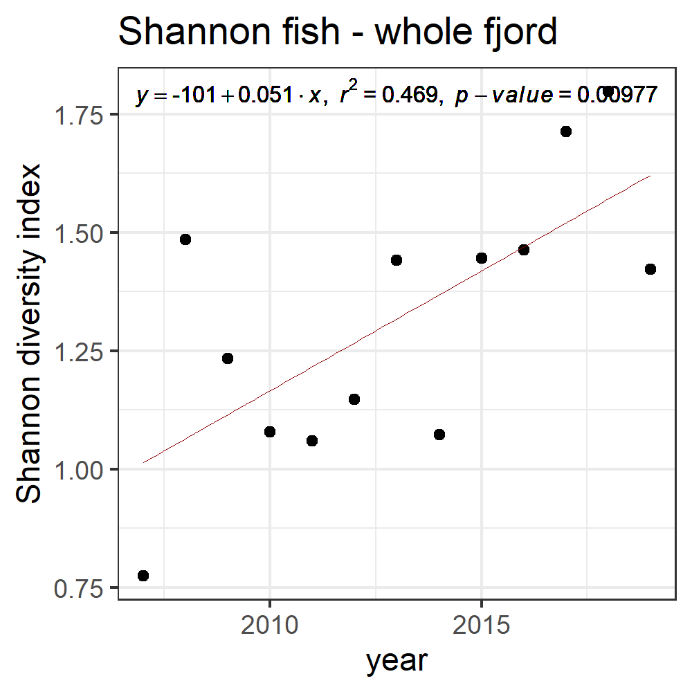

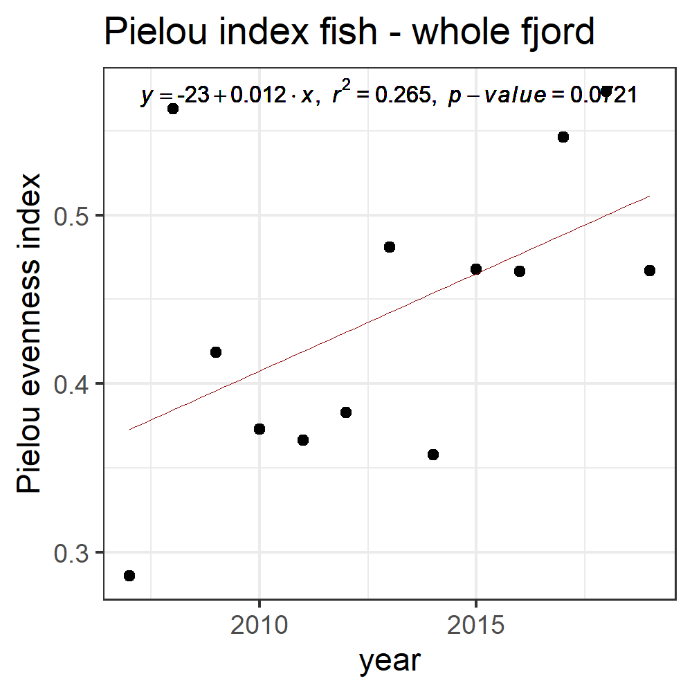
*

Fig. S5: (A) Linear regression of the log(x+1) transformed stratified biomass of megabenthic warm-water and cold-water taxa (from the K-means clustering on the score of the two first axis of the compromise) over time. Equation of the regression, its r², and its p-value are printed for each group in each area of the fjord.

A


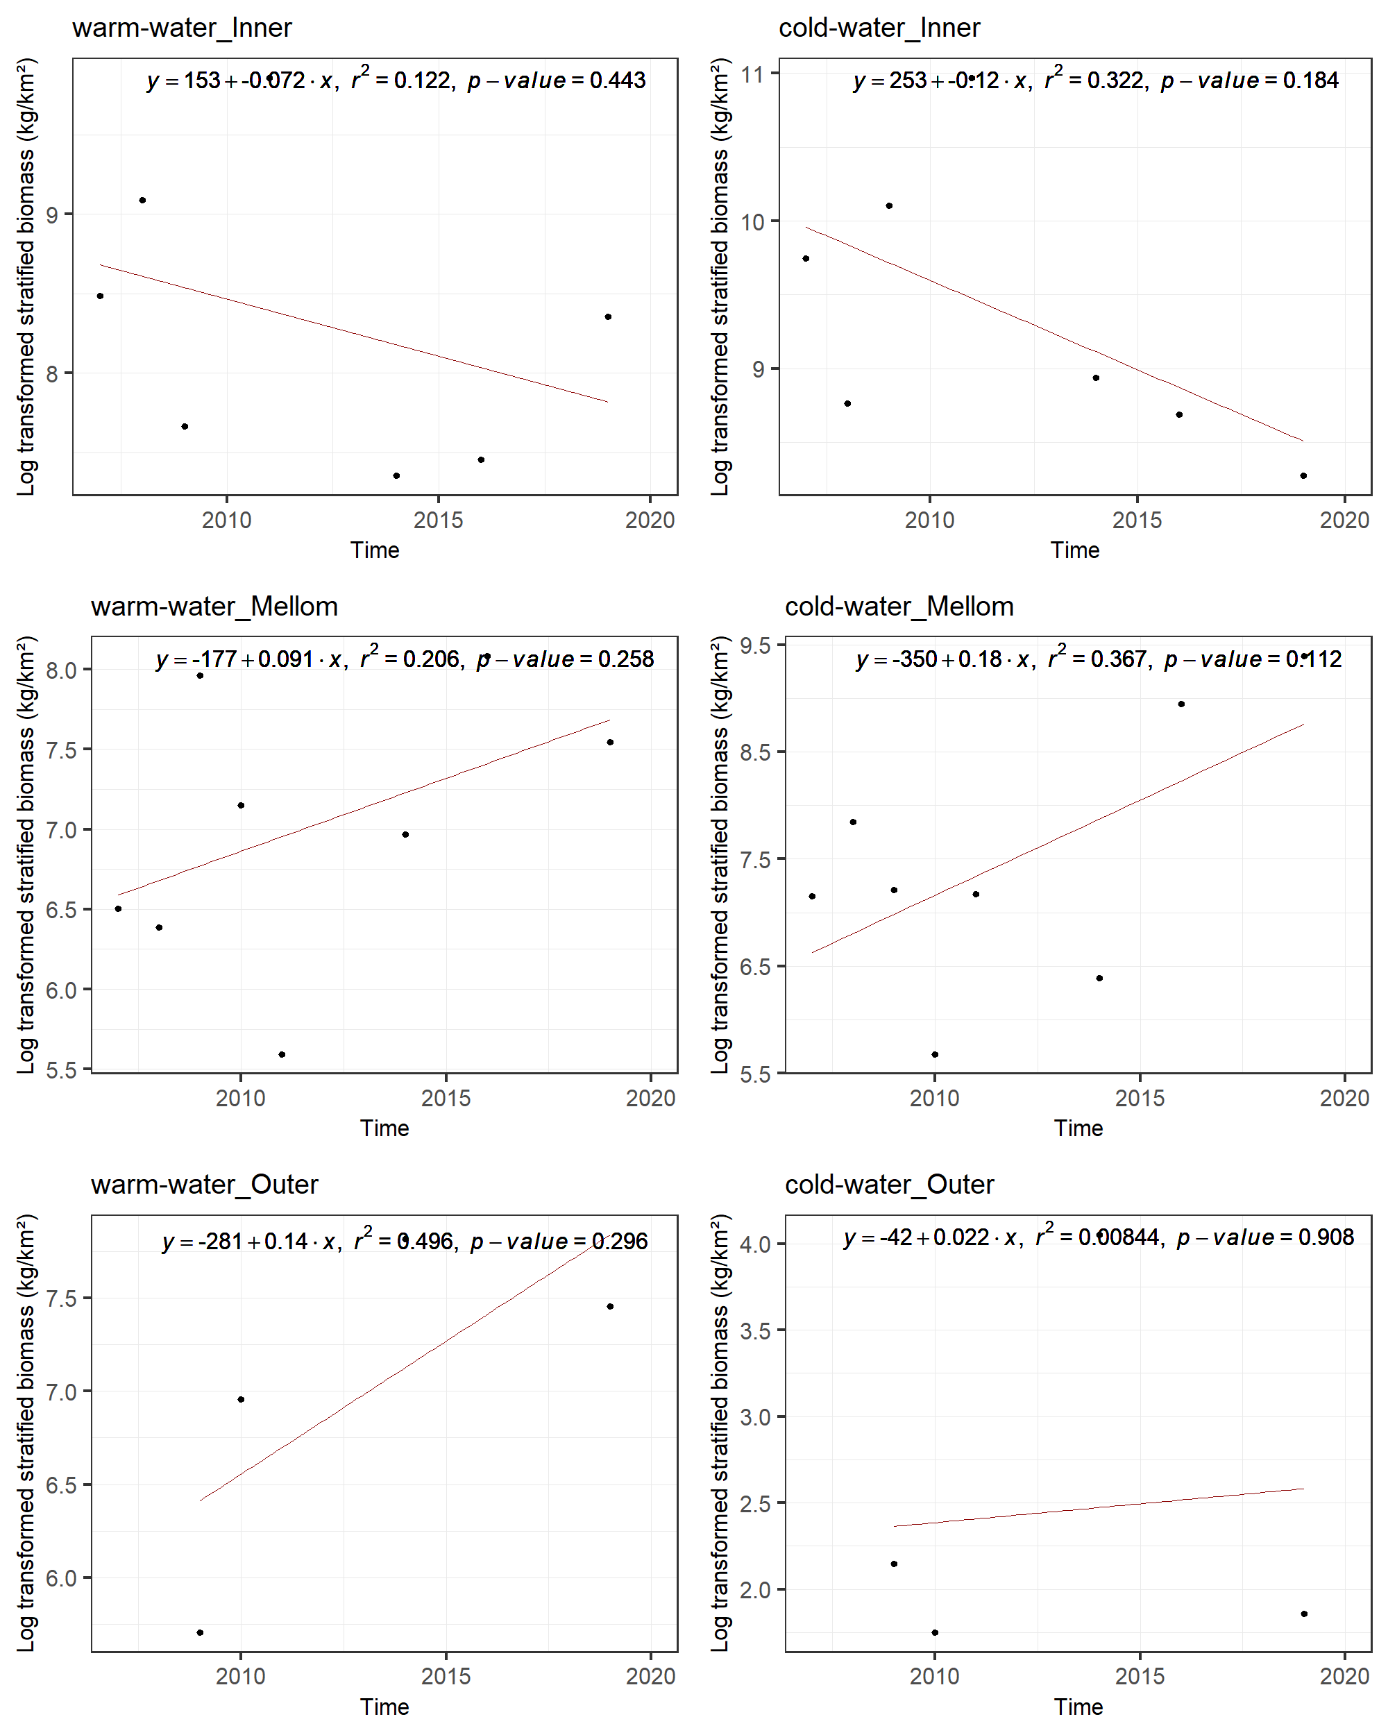


(B) Linear regression of the log(x+1) transformed stratified biomass of megabenthic cold-water taxa without red king crab *Paralithodes camtschaticus*.

B


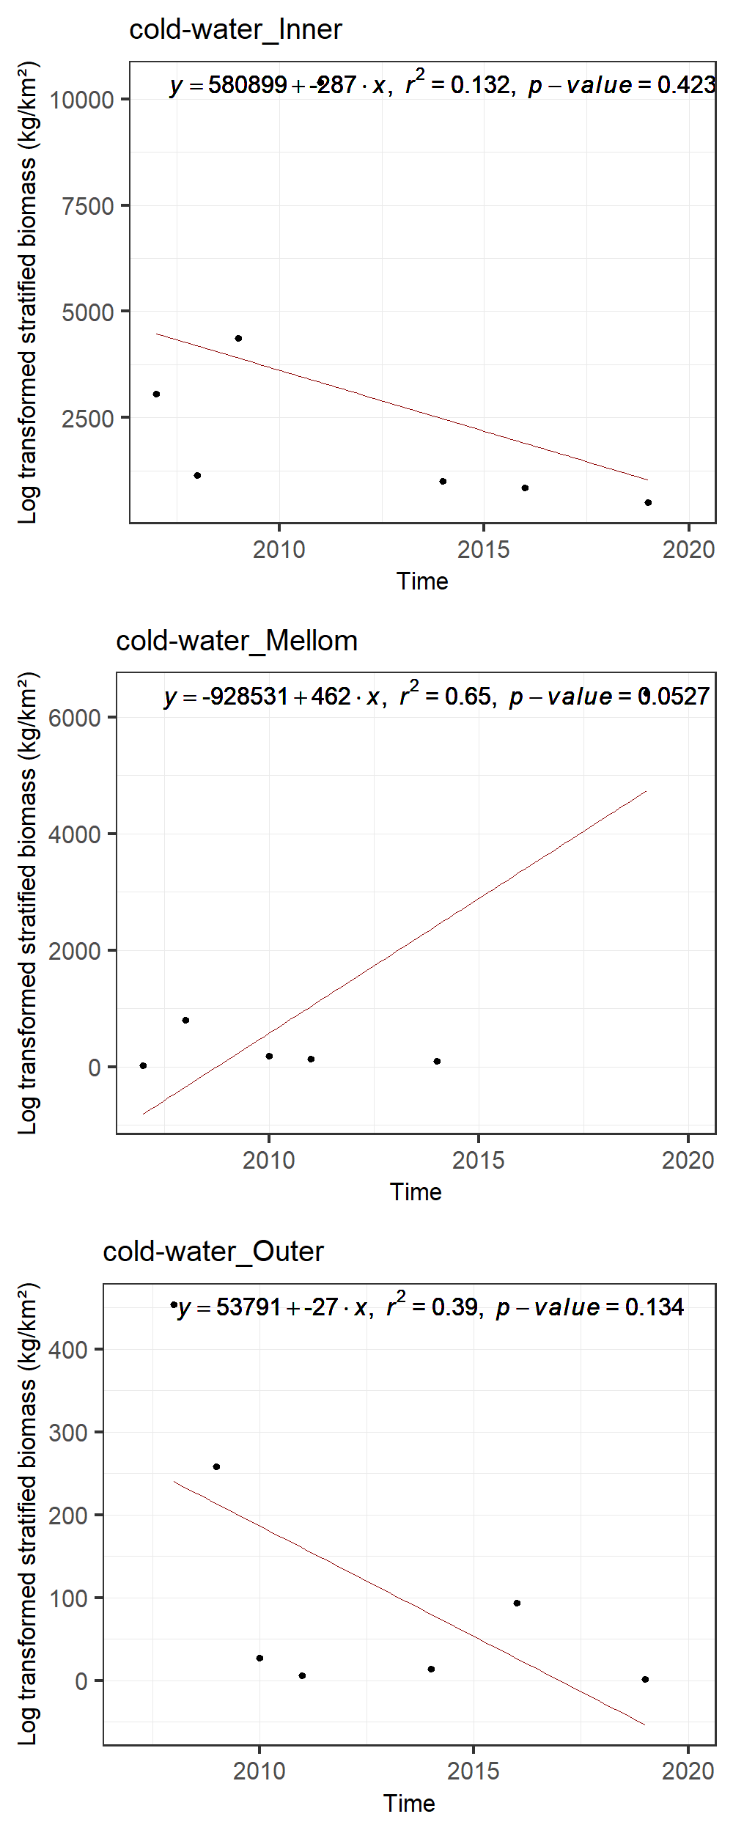


Fig S6: Intrastructure plots for megabenthos: (A) yearly average position of environmental variables, (B) score of the environmental variables on axis 1 of the *compromise*, (C) yearly average position of the group of taxa from the Kmeans clustering, (D) score of the taxa on axis 1 of the *compromise*. Intrastructure plots for fish: (E) yearly average position of the group of taxa from the Kmeans clustering (F) score of the taxa on axis 1 of the *compromise*.


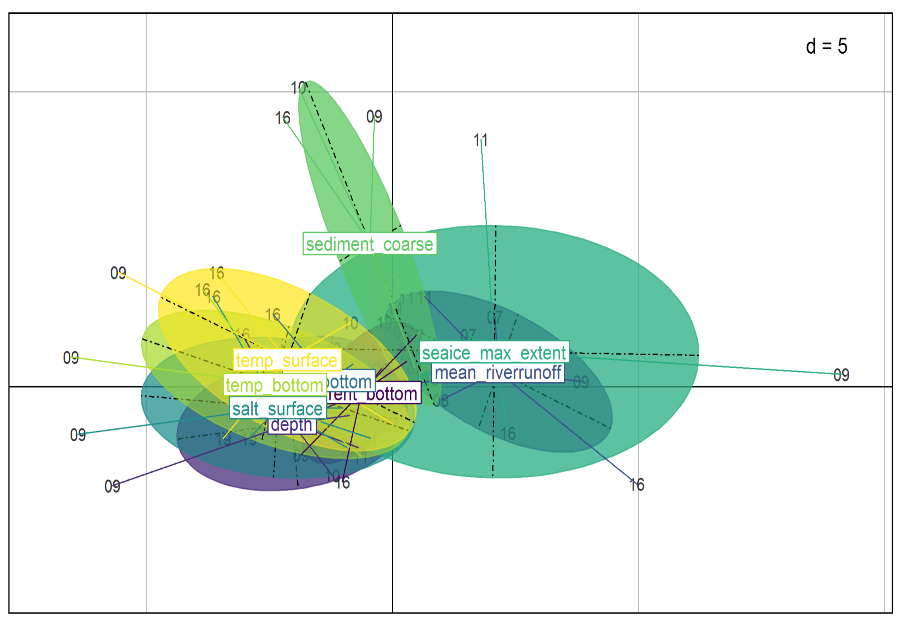

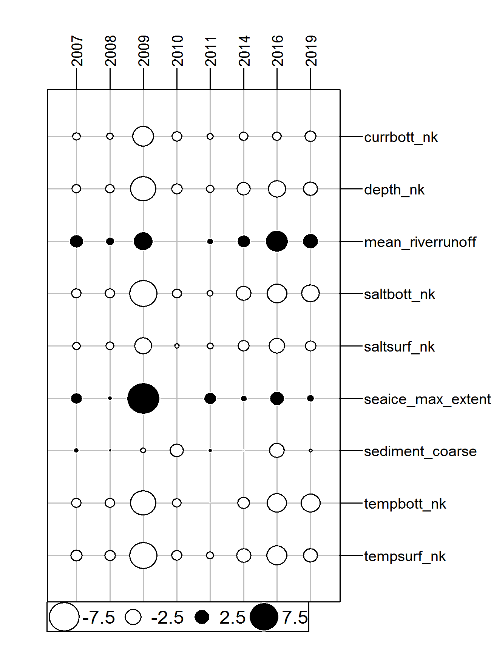

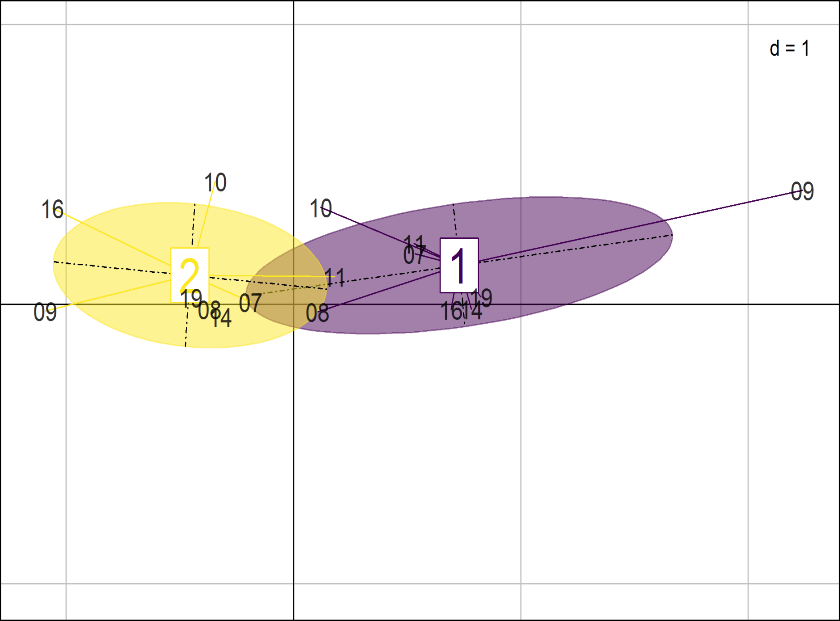

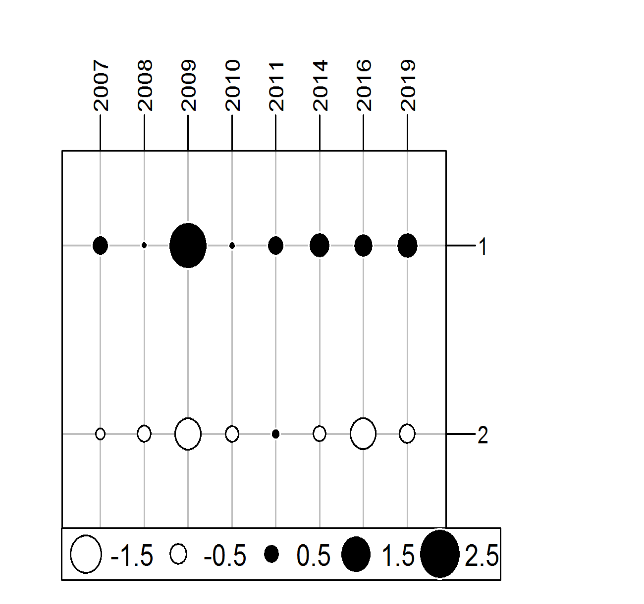


D

C

B

A


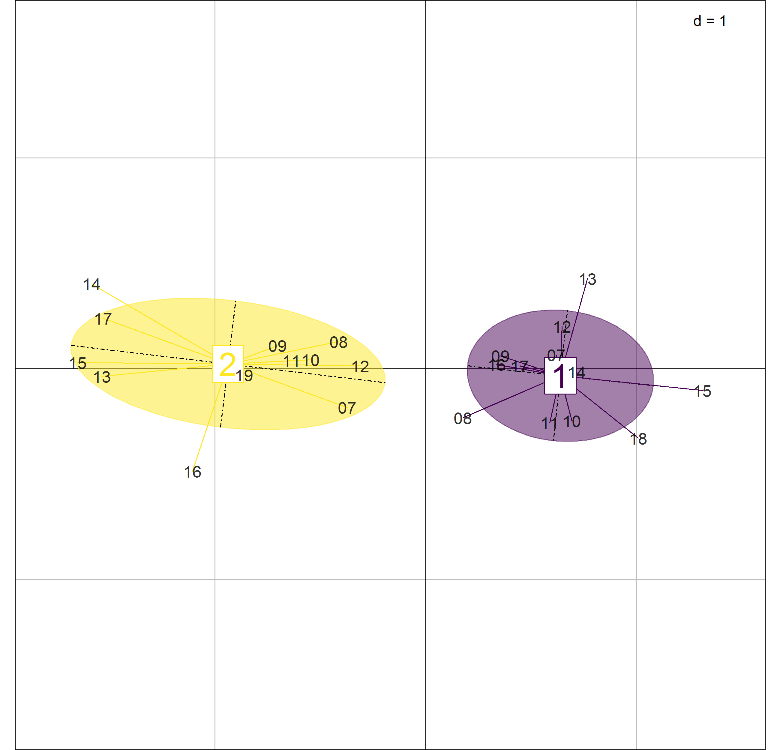

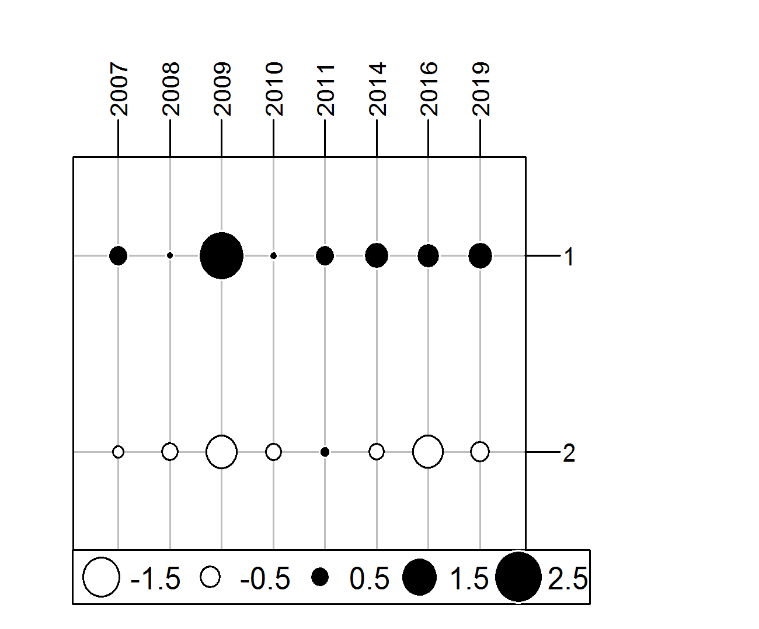


F

E

Fig S7: Yearly log(x+1) transformed stratified biomass (kg/km²) of fish taxa into the Porsanger.


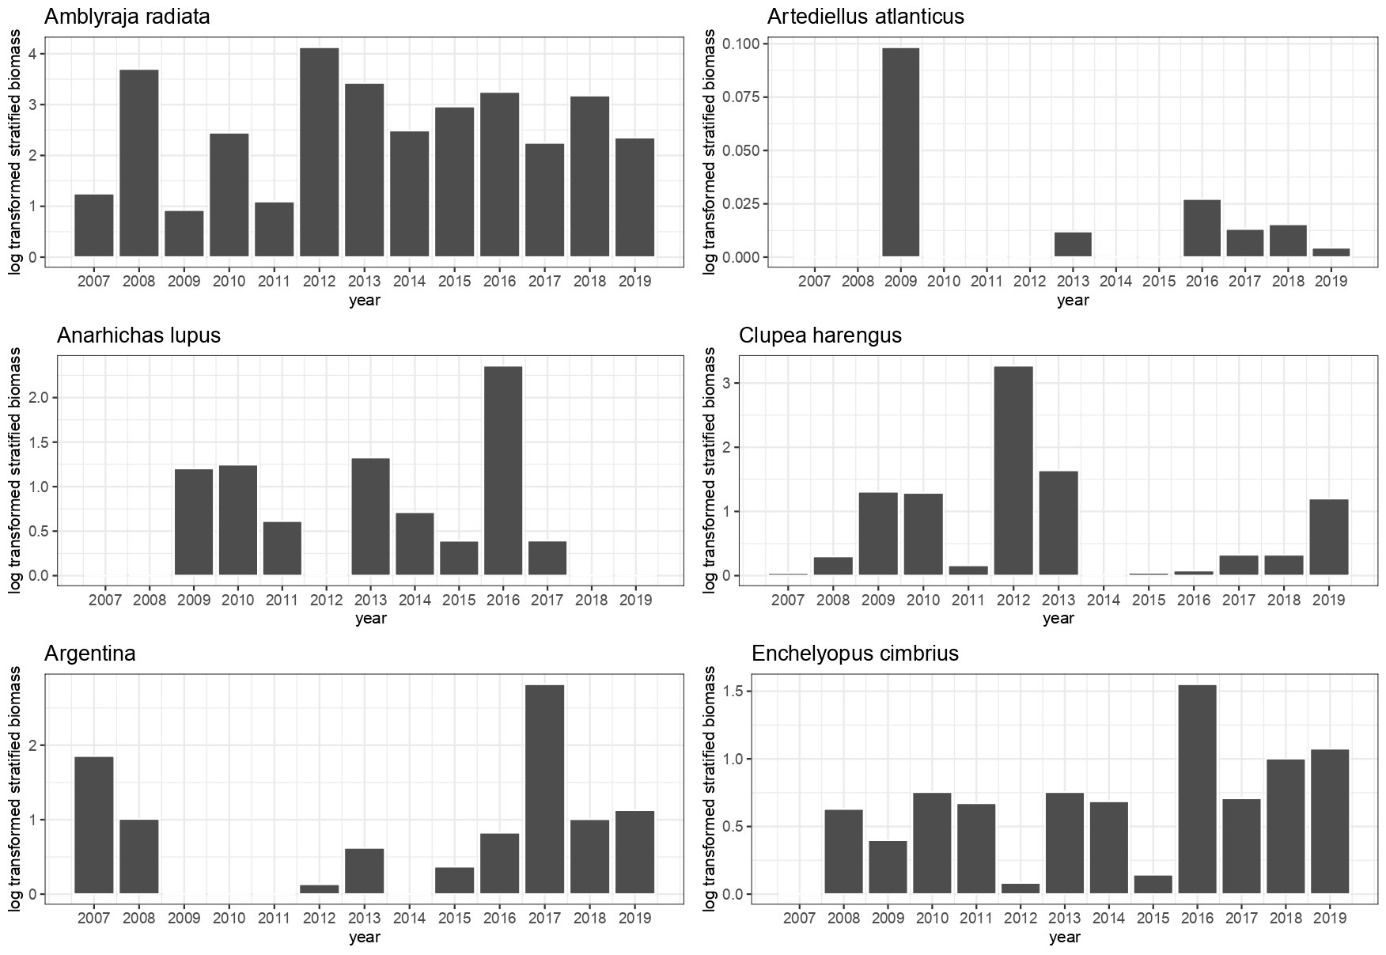

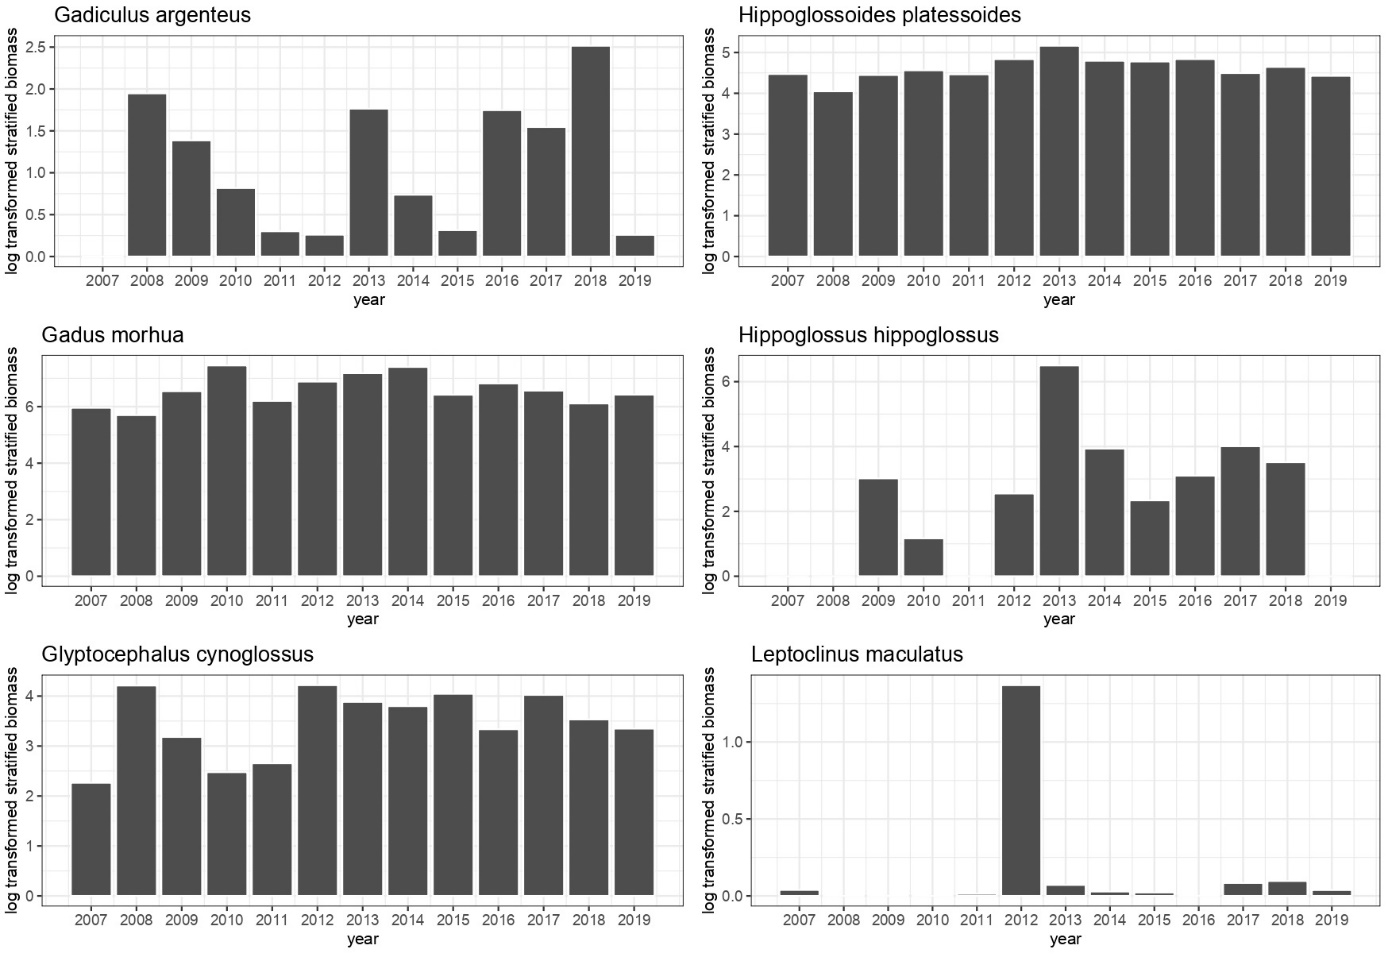

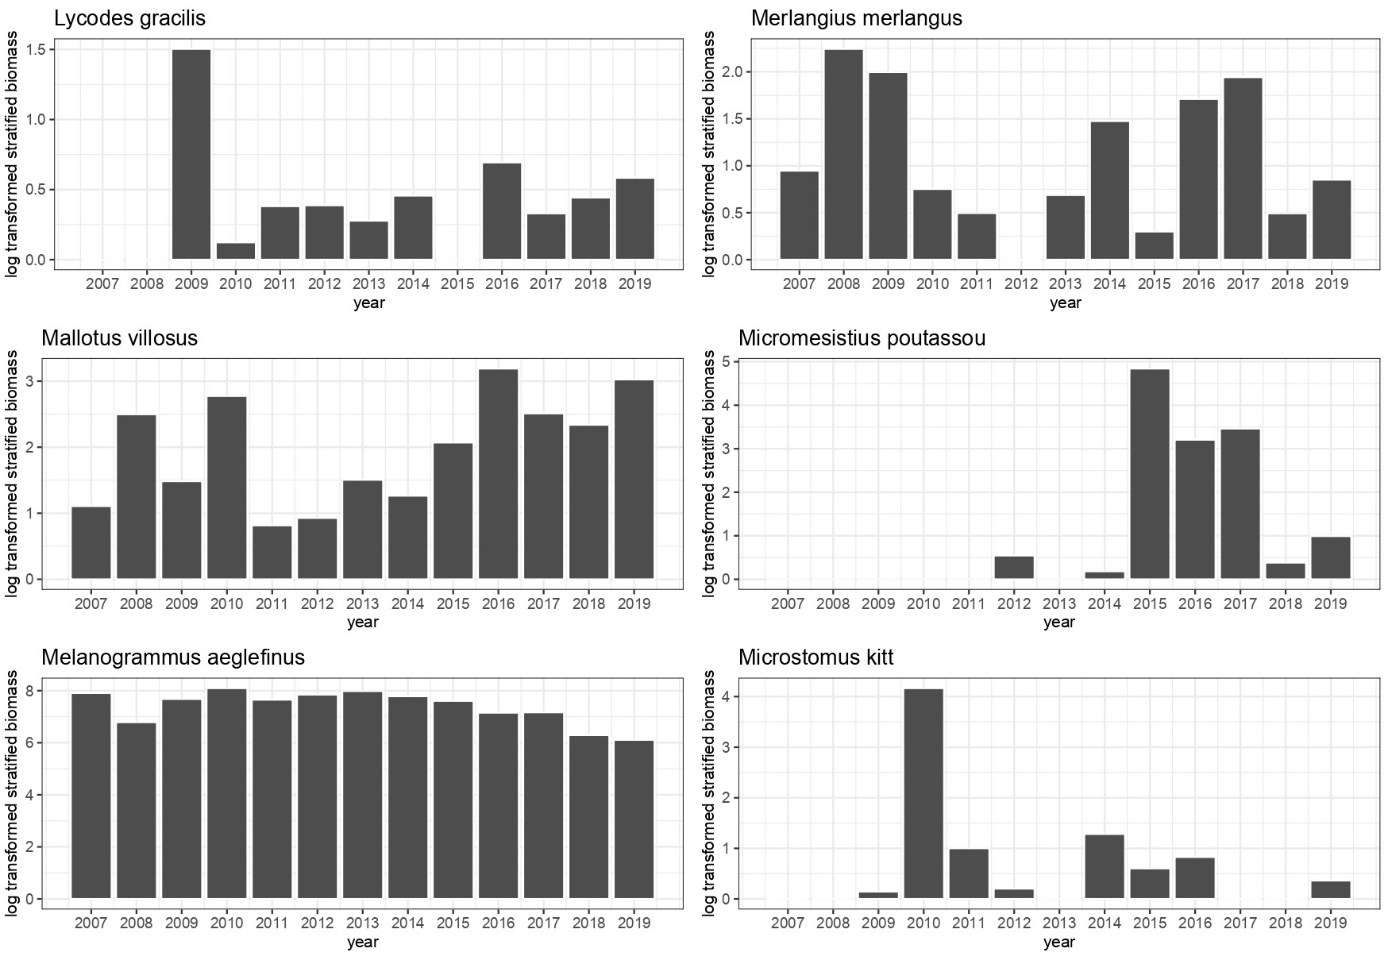

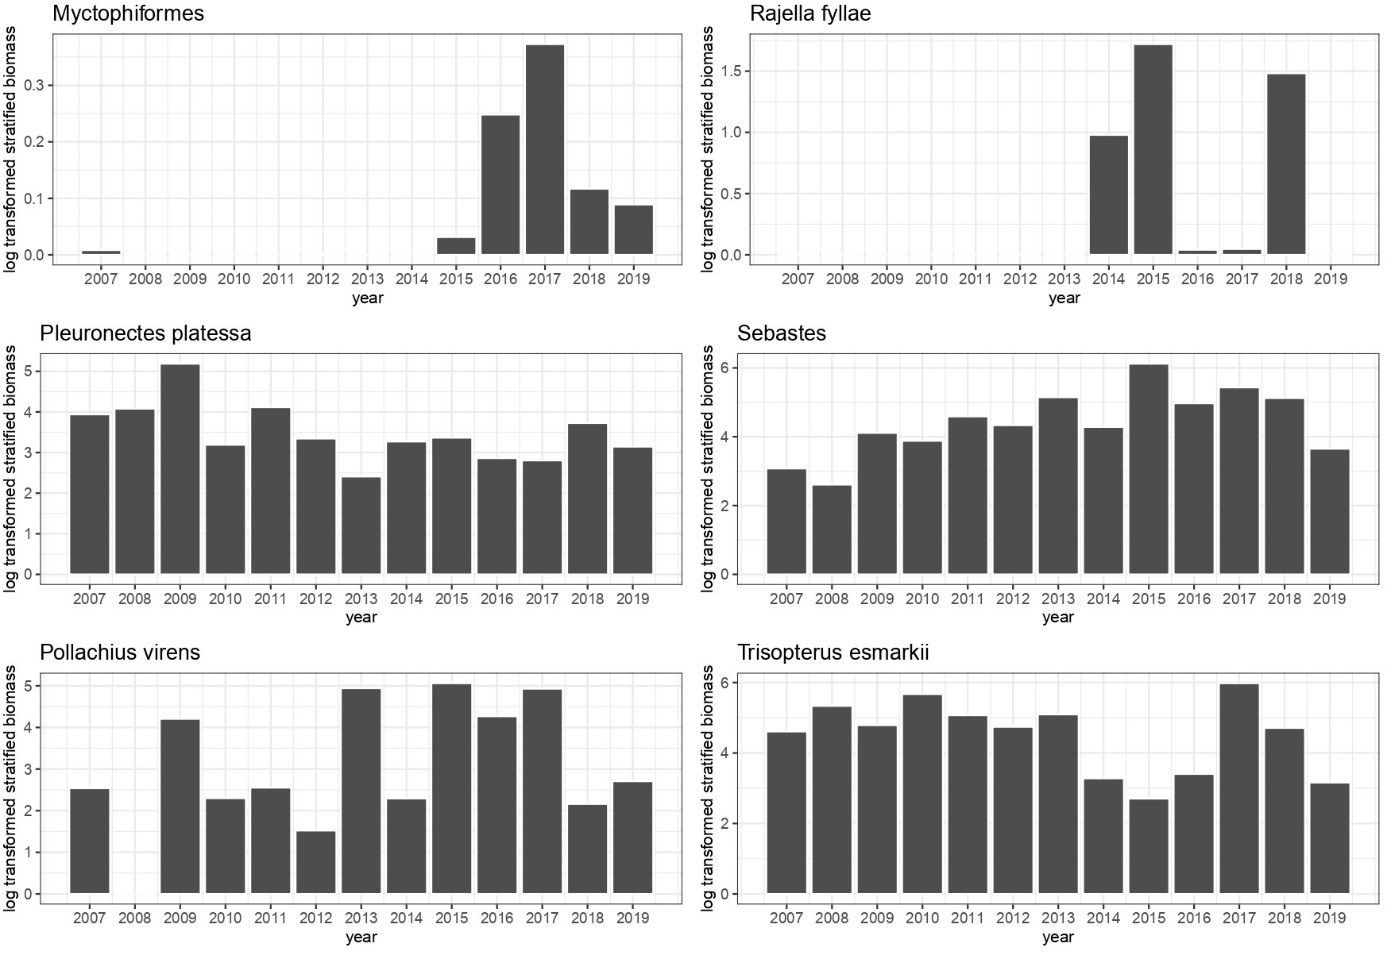

Supplement: Supplementary file 1 [file 34271378]
